# Supplementary material for: QMEANDisCo—distance constraints applied on model quality estimation
Source: PubMed Central journal article supplement (PMC7075525; doi:10.1093/bioinformatics/btz828), 2019-11-07
Supplement: btz828_supplementary_data.pdf [file btz828_supplementary_data.pdf]

# **QMEANDisCo – Distance Constraints Applied on Model Quality Estimation**

## Supplemental Materials

Gabriel Studer<sup>1,2</sup>, Christine Rempfer<sup>1,2</sup>, Andrew M Waterhouse<sup>1,2</sup>, Rafal Gumienny<sup>1,2</sup>,  
Juergen Haas<sup>1,2</sup> and Torsten Schwede<sup>1,2</sup>

<sup>1</sup>Biozentrum, University of Basel, Basel, 4056, Switzerland,

<sup>2</sup>SIB Swiss Institute of Bioinformatics, Basel, 4056, Switzerland

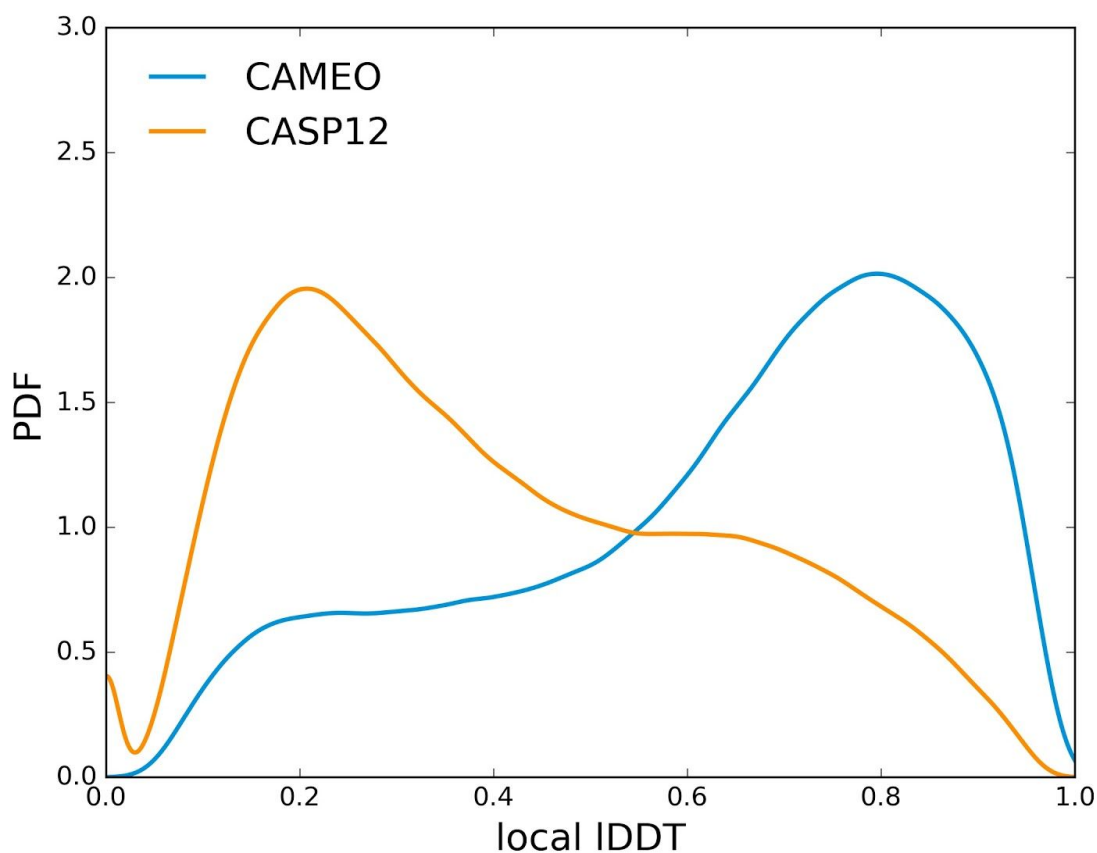

**Fig. S1. Per-residue IDDT distribution of data sets used for training.** Training relies on two data sets. One is compiled from data provided by the CASP12 experiment and another one from the CAMEO continuous evaluation platform. The probability density functions have been estimated with Gaussian kernel density estimates from raw per-residue IDDT data points. The peak at 0.0 for local IDDT arises from residues with stereo-chemical issues/clashes with the backbone atoms involved.

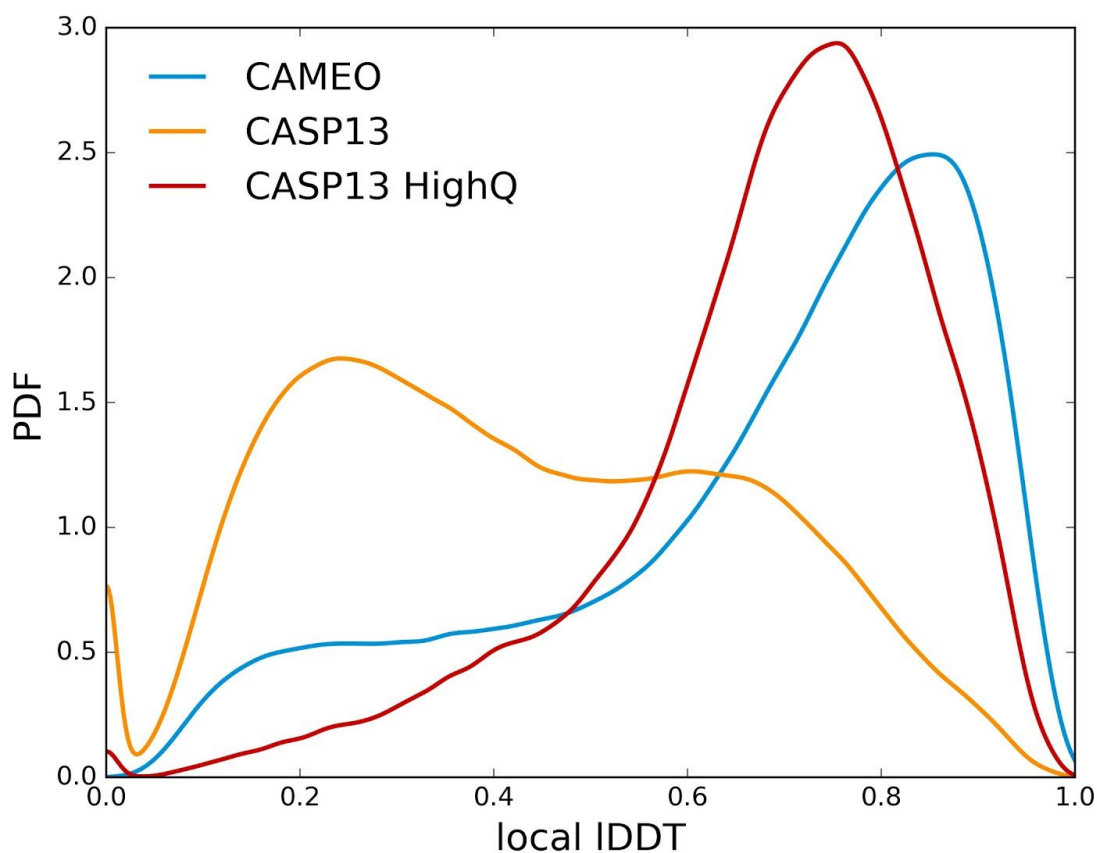

**Fig. S2. Per-residue IDDT distribution of data sets used for testing.** Testing relies on two data sets, one compiled from data provided by the CASP13 experiment and another one from the CAMEO continuous evaluation platform. An additional third set is a subset from CASP13 only originating from models with global IDDT > 0.6 (CASP13 HighQ). The probability density functions have been estimated with Gaussian kernel density estimates from raw per-residue IDDT data points. The peaks at 0.0 for local IDDT arise from residues with stereo-chemical issues/clashes with the backbone atoms involved.

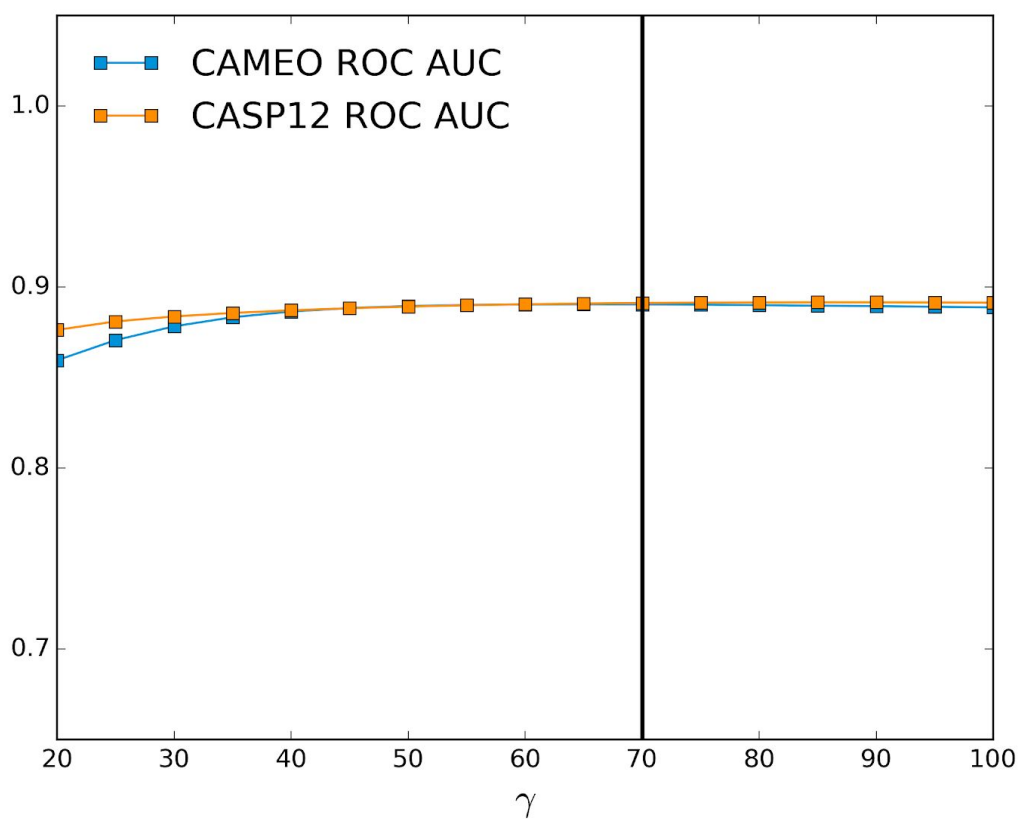

**Fig. S3. Influence of  $\gamma$  on DisCo performance**  $\gamma$  is relevant for constructing DisCo as described in section 2.4 of the main manuscript. Performance of DisCo with varying  $\gamma$  is estimated as ROC AUC with respect to per-residue IDDT scores. CAMEO and CASP12 are the data sets described in section 2.5 of the main manuscript and only per-residue data with valid DisCo score has been used for evaluation. The vertical line depicts the default value for  $\gamma$  (70).

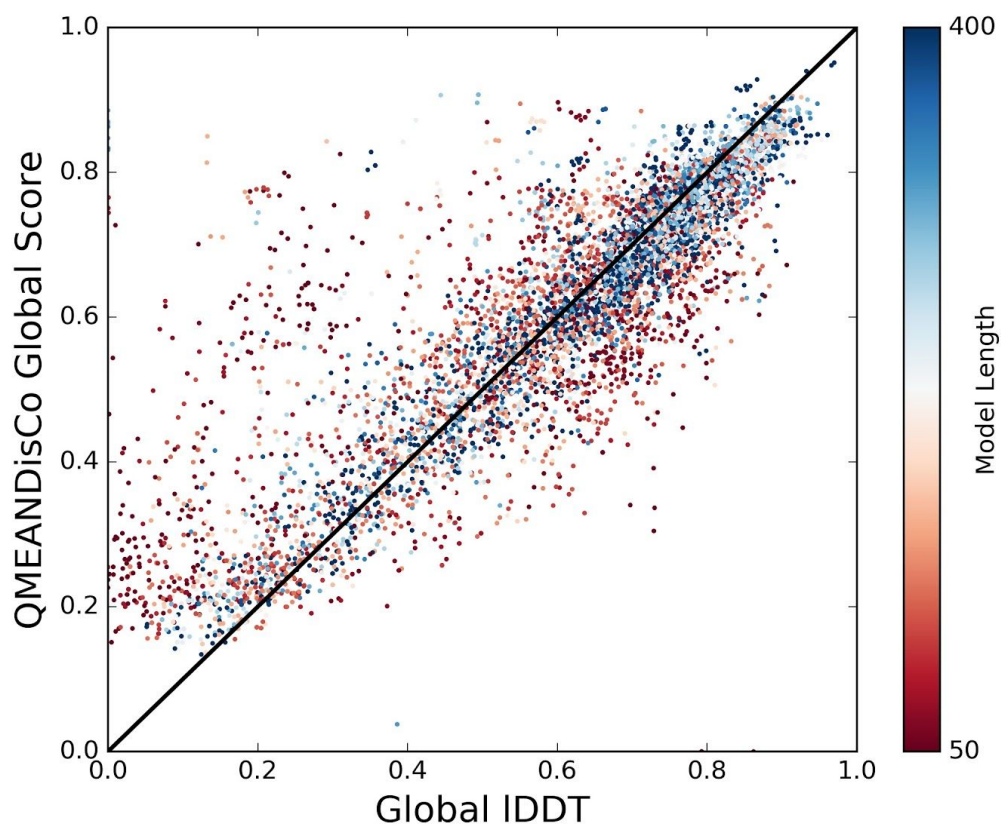

**Fig. S4. Global scoring evaluation on CAMEO models.** IDDT penalizes for missing residues. QMEANDisCo does not consider that by default and thus overpredicts incomplete models. A Pearson correlation of 0.85 between QMEANDisCo global score and IDDT global score could be achieved in this case. A coverage corrected version of this plot is available as Figure 5 in the main manuscript.

# Statistical Potential Parametrization

The probability density functions of the statistical potential terms are based on histograms with the following parametrization:

**All-Atom Interaction Potential:** minimal distance: 0.0Å, maximal distance: 10.0Å, bin size: 0.5Å, sequence separation: 4 residues

**Cβ Interaction Potential:** minimal distance: 0.0Å, maximal distance: 12.0Å, bin size: 0.5Å, sequence separation: 4 residues

**Packing Potential:** inclusion radius: 5.0Å, max counts: 32

**Torsion Potential:** bin size: 20°

**Cβ Packing Potential:** inclusion radius: 8.0Å, max counts: 20

**Reduced Potential:** Every residue is represented by its Cα position  $p$  and a directional component  $v = \text{norm}(ca\_pos - n\_pos) + \text{norm}(ca\_pos - c\_pos)$ . For interacting residues  $r_1$  and  $r_2$ , we can define a line  $l$  between  $p_1$  and  $p_2$ . The statistical potential then considers:

- dist: distance between  $p_1$  and  $p_2$
- alpha: angle between  $v_1$  and  $l$
- beta: angle between  $v_2$  and  $l$
- gamma: dihedral angle between  $(p_1 + v_1, p_1, p_2, p_2 + v_2)$

minimal distance: 0.0Å, maximal distance: 10.0Å, distance bin size: 1Å, sequence separation: 4, angular bin size (alpha, beta): 22.5°, dihedral bin size (gamma): 45°

## Running HHblits for Homology Detection

HHblits version 2.0.16 is used to detect homologues given a target sequence stored in target.fasta. A search profile (target.a3m) is generated with:

```
hhblits -e 0.001 -i target.fasta -oa3m target.a3m -d path_to_nrdb
```

The last argument specifies the database for sequence search. QMEANDisCo uses the nr20 database (12Aug11) provided by the Söding lab.

Homologues are identified using the following command:

```
hhblits -macct 0.35 -n 1 -e 0.001 -Z 10000 -B 10000 -i target.a3m -o  
target.hhr -d hhblits_db
```

The hhblits\_db is the profile database that is searched for homologues. QMEANDisCo uses the weekly updated SWISS-MODEL template library (SMTL) for homology search. The SMTL is a copy of the protein data bank (PDB) enriched with annotations relevant for modelling.

## Clustering Homologues in DisCo Construction

Given  $k$  homologues with their respective pairwise sequence alignment towards a common target sequence (the sequence of the model being assessed), clustering proceeds as follows:

- Construct a multiple sequence alignment using the “star-method” with the target sequence as “center” sequence
- Calculate all  $k * (k - 1)/2$  pairwise sequence similarities. Given a substitution matrix  $S$ , the sequence similarity between sequences  $a$  and  $b$  in the multiple sequence

$$\text{alignm} \text{ is defined as: } \text{seqsim}(a, b) = \frac{1}{N * (\max(S) - \min(S))} \sum_i S(a[i], b[i]) - \min(S)$$

where  $i$  iterates over all  $N$  pairs of characters in  $a$  and  $b$  that are aligned and covered by structural information (C $\alpha$  position resolved). BLOSUM62 is used as substitution matrix  $S$ .

- Perform a hierarchical agglomerative clustering using an unweighted average linkage criterion for cluster merging.
- Stop merging clusters when distance between clusters falls below 0.5.



## Feature Groups for Neural Network Training

Some quality predictors for the neural network input layer are potentially invalid. Examples include terminal residues for which no backbone dihedral angles can be estimated, invalid DisCo scores due to lacking HHblits search results or no agreement terms due to absent external dependencies. QMEANDisCo solves that problem with the NNScorer object that trains a neural network for each of the feature combinations specified below. Given a set of input features, the NNScorer iterates over the list of feature combinations and applies the first neural network for which all required input features are available. The used feature combinations are:

- avg\_torsion, avg\_reduced, avg\_interaction, avg\_cb\_interaction, avg\_packing, avg\_cb\_packing, N, packing, cb\_packing, solv\_acc, clash, torsion, reduced, interaction, cb\_interaction, avg\_ss\_agreement, avg\_acc\_agreement, ss\_agreement, acc\_agreement, disco\_related\_features
- avg\_torsion, avg\_reduced, avg\_interaction, avg\_cb\_interaction, avg\_packing, avg\_cb\_packing, N, packing, cb\_packing, solv\_acc, clash, reduced, interaction, cb\_interaction, avg\_ss\_agreement, avg\_acc\_agreement, ss\_agreement, acc\_agreement, disco\_related\_features
- avg\_torsion, avg\_reduced, avg\_interaction, avg\_cb\_interaction, avg\_packing, avg\_cb\_packing, N, packing, cb\_packing, solv\_acc, clash, torsion, avg\_ss\_agreement, avg\_acc\_agreement, ss\_agreement, acc\_agreement, disco\_related\_features
- avg\_torsion, avg\_reduced, avg\_interaction, avg\_cb\_interaction, avg\_packing, avg\_cb\_packing, N, packing, cb\_packing, solv\_acc, clash, torsion, reduced, interaction, cb\_interaction, disco\_related\_features
- avg\_torsion, avg\_reduced, avg\_interaction, avg\_cb\_interaction, avg\_packing, avg\_cb\_packing, N, packing, cb\_packing, solv\_acc, clash, torsion, reduced, interaction, cb\_interaction, avg\_ss\_agreement, avg\_acc\_agreement, ss\_agreement, acc\_agreement
- avg\_torsion, avg\_reduced, avg\_interaction, avg\_cb\_interaction, avg\_packing, avg\_cb\_packing, N, packing, cb\_packing, solv\_acc, clash, torsion, reduced, interaction, cb\_interaction
- avg\_torsion, avg\_reduced, avg\_interaction, avg\_cb\_interaction, avg\_packing, avg\_cb\_packing, N, packing, cb\_packing, solv\_acc, clash, torsion, avg\_ss\_agreement, avg\_acc\_agreement, ss\_agreement, acc\_agreement
- avg\_torsion, avg\_reduced, avg\_interaction, avg\_cb\_interaction, avg\_packing, avg\_cb\_packing, N, packing, cb\_packing, solv\_acc, clash, torsion, disco\_related\_features
- avg\_torsion, avg\_reduced, avg\_interaction, avg\_cb\_interaction, avg\_packing, avg\_cb\_packing, N, packing, cb\_packing, solv\_acc, clash, reduced, interaction, cb\_interaction, avg\_ss\_agreement, avg\_acc\_agreement, ss\_agreement, acc\_agreement
- avg\_torsion, avg\_reduced, avg\_interaction, avg\_cb\_interaction, avg\_packing, avg\_cb\_packing, N, packing, cb\_packing, solv\_acc, clash, reduced, interaction, cb\_interaction, disco\_related\_features
- avg\_torsion, avg\_reduced, avg\_interaction, avg\_cb\_interaction, avg\_packing, avg\_cb\_packing, N, packing, cb\_packing, solv\_acc, clash, avg\_ss\_agreement, avg\_acc\_agreement, ss\_agreement, acc\_agreement, disco\_related\_features
- avg\_torsion, avg\_reduced, avg\_interaction, avg\_cb\_interaction, avg\_packing, avg\_cb\_packing, N, packing, cb\_packing, solv\_acc, clash, torsion
- avg\_torsion, avg\_reduced, avg\_interaction, avg\_cb\_interaction, avg\_packing, avg\_cb\_packing, N, packing, cb\_packing, solv\_acc, clash, reduced, interaction, cb\_interaction
- avg\_torsion, avg\_reduced, avg\_interaction, avg\_cb\_interaction, avg\_packing, avg\_cb\_packing, N, packing, cb\_packing, solv\_acc, clash, avg\_ss\_agreement, avg\_acc\_agreement, ss\_agreement, acc\_agreement
- avg\_torsion, avg\_reduced, avg\_interaction, avg\_cb\_interaction, avg\_packing, avg\_cb\_packing, N, packing, cb\_packing, solv\_acc, clash, disco\_related\_features
- avg\_torsion, avg\_reduced, avg\_interaction, avg\_cb\_interaction, avg\_packing, avg\_cb\_packing, N, packing, cb\_packing, solv\_acc, clash

## Neural Networks and Additional Features

Starting from the linear combination employed by QMEAN 3, the impact of using neural networks and gradually adding more features specific to QMEANDisCo are reported in Table S3. Training and validation in this analysis follow the cross-validation procedure described in section 2.5 of the main manuscript. The neural networks are trained in form of full NNScorer objects with the finally used training parameterization/ network topology. However, the number of input features gradually increases. This gives the following NNScorers with their respective feature groups:

### **basic** (features from the current version of QMEAN):

- packing, solv\_acc, torsion, interaction, cb\_interaction, ss\_agreement, acc\_agreement
- packing, solv\_acc, torsion, interaction, cb\_interaction
- packing, solv\_acc, torsion, ss\_agreement, acc\_agreement
- packing, solv\_acc, interaction, cb\_interaction, ss\_agreement, acc\_agreement
- packing, solv\_acc, torsion
- packing, solv\_acc, interaction, cb\_interaction
- packing, solv\_acc, ss\_agreement, acc\_agreement
- packing, solv\_acc

### **plus\_4** (same as before but added 4 QMEANDisCo specific features)

- N, packing, cb\_packing, solv\_acc, clash, torsion, reduced, interaction, cb\_interaction, ss\_agreement, acc\_agreement
- N, packing, cb\_packing, solv\_acc, clash, torsion, reduced, interaction, cb\_interaction
- N, packing, cb\_packing, solv\_acc, clash, torsion, ss\_agreement, acc\_agreement
- N, packing, cb\_packing, solv\_acc, clash, reduced, interaction, cb\_interaction, ss\_agreement, acc\_agreement
- N, packing, cb\_packing, solv\_acc, clash, torsion
- N, packing, cb\_packing, solv\_acc, clash, reduced, interaction, cb\_interaction
- N, packing, cb\_packing, solv\_acc, clash, ss\_agreement, acc\_agreement
- N, packing, cb\_packing, solv\_acc, clash

### **plus\_avg** (same as before but added average values of statistical potentials and agreement terms)

- avg\_torsion, avg\_reduced, avg\_interaction, avg\_cb\_interaction, avg\_packing, avg\_cb\_packing, N, packing, cb\_packing, solv\_acc, clash, torsion, reduced, interaction, cb\_interaction, avg\_ss\_agreement, avg\_acc\_agreement, ss\_agreement, acc\_agreement
- avg\_torsion, avg\_reduced, avg\_interaction, avg\_cb\_interaction, avg\_packing, avg\_cb\_packing, N, packing, cb\_packing, solv\_acc, clash, torsion, reduced, interaction, cb\_interaction
- avg\_torsion, avg\_reduced, avg\_interaction, avg\_cb\_interaction, avg\_packing, avg\_cb\_packing, N, packing, cb\_packing, solv\_acc, clash, torsion, avg\_ss\_agreement, avg\_acc\_agreement, ss\_agreement, acc\_agreement
- avg\_torsion, avg\_reduced, avg\_interaction, avg\_cb\_interaction, avg\_packing, avg\_cb\_packing, N, packing, cb\_packing, solv\_acc, clash, reduced, interaction, cb\_interaction, avg\_ss\_agreement, avg\_acc\_agreement, ss\_agreement, acc\_agreement
- avg\_torsion, avg\_reduced, avg\_interaction, avg\_cb\_interaction, avg\_packing, avg\_cb\_packing, N, packing, cb\_packing, solv\_acc, clash, torsion
- avg\_torsion, avg\_reduced, avg\_interaction, avg\_cb\_interaction, avg\_packing, avg\_cb\_packing, N, packing, cb\_packing, solv\_acc, clash, reduced, interaction, cb\_interaction
- avg\_torsion, avg\_reduced, avg\_interaction, avg\_cb\_interaction, avg\_packing, avg\_cb\_packing, N, packing, cb\_packing, solv\_acc, clash, avg\_ss\_agreement, avg\_acc\_agreement, ss\_agreement, acc\_agreement
- avg\_torsion, avg\_reduced, avg\_interaction, avg\_cb\_interaction, avg\_packing, avg\_cb\_packing, N, packing, cb\_packing, solv\_acc, clash,

### **full** (The finally used full NNScorer with the previously defined feature groups)

Tab. S1. Top performing training parameters/network topologies when validated on CAMEO and CASP12. This is the result of the first optimization round and thus excludes all data points where any of the input features is invalid. The network parameters are separated by '\_' and encode 1. training data 2. optimizer 3. error function 4. training epochs 5. batch size 6. zero based topology index referring to the topologies listed in section 2.5 in the main manuscript.

| Network Parameters               | ROC AUC |           |         |           | Spearman Correlation |           |         |           | Pearson Correlation |           |         |           |
|----------------------------------|---------|-----------|---------|-----------|----------------------|-----------|---------|-----------|---------------------|-----------|---------|-----------|
|                                  | CAMEO   |           | CASP12  |           | CAMEO                |           | CASP12  |           | CAMEO               |           | CASP12  |           |
|                                  | Overall | per-model | Overall | per-model | Overall              | per-model | Overall | per-model | Overall             | per-model | Overall | per-model |
| cameo_rmsprop_mse_200_200_0      | 0.935   | 0.876     | 0.941   | 0.831     | 0.862                | 0.648     | 0.861   | 0.576     | 0.881               | 0.679     | 0.864   | 0.592     |
| mixed_rmsprop_mse_200_400_0      | 0.935   | 0.875     | 0.945   | 0.832     | 0.863                | 0.649     | 0.872   | 0.587     | 0.881               | 0.681     | 0.877   | 0.603     |
| mixed_rmsprop_mse_100_100_0      | 0.936   | 0.875     | 0.943   | 0.831     | 0.865                | 0.649     | 0.869   | 0.584     | 0.882               | 0.681     | 0.875   | 0.601     |
| mixed_rmsprop_mse_200_100_0      | 0.937   | 0.875     | 0.944   | 0.830     | 0.865                | 0.649     | 0.869   | 0.581     | 0.883               | 0.680     | 0.874   | 0.598     |
| mixed_rmsprop_mse_100_400_2      | 0.936   | 0.875     | 0.943   | 0.828     | 0.864                | 0.648     | 0.870   | 0.581     | 0.882               | 0.680     | 0.874   | 0.597     |
| cameo_rmsprop_mse_100_200_0      | 0.935   | 0.874     | 0.942   | 0.831     | 0.863                | 0.648     | 0.863   | 0.576     | 0.882               | 0.679     | 0.866   | 0.590     |
| mixed_rmsprop_mse_100_400_0      | 0.936   | 0.874     | 0.945   | 0.831     | 0.865                | 0.646     | 0.871   | 0.587     | 0.882               | 0.678     | 0.877   | 0.603     |
| mixed_adam_mse_100_100_0         | 0.935   | 0.874     | 0.944   | 0.829     | 0.862                | 0.646     | 0.871   | 0.582     | 0.880               | 0.678     | 0.876   | 0.598     |
| mixed_rmsprop_mse_400_200_2      | 0.934   | 0.874     | 0.943   | 0.828     | 0.861                | 0.646     | 0.868   | 0.577     | 0.880               | 0.678     | 0.873   | 0.593     |
| cameo_rmsprop_mse_100_400_2      | 0.934   | 0.874     | 0.940   | 0.830     | 0.860                | 0.645     | 0.860   | 0.576     | 0.880               | 0.678     | 0.864   | 0.589     |
| mixed_rmsprop_mse_400_100_0      | 0.935   | 0.874     | 0.943   | 0.830     | 0.861                | 0.646     | 0.868   | 0.580     | 0.880               | 0.677     | 0.873   | 0.597     |
| mixed_rmsprop_mse_100_100_2      | 0.936   | 0.874     | 0.944   | 0.828     | 0.864                | 0.647     | 0.871   | 0.580     | 0.882               | 0.679     | 0.875   | 0.596     |
| cameo_rmsprop_mse_100_400_0      | 0.935   | 0.874     | 0.943   | 0.831     | 0.863                | 0.647     | 0.864   | 0.580     | 0.881               | 0.678     | 0.868   | 0.594     |
| cameo_rmsprop_mse_400_200_0      | 0.935   | 0.874     | 0.941   | 0.829     | 0.860                | 0.647     | 0.860   | 0.573     | 0.880               | 0.677     | 0.864   | 0.588     |
| mixed_rmsprop_mse_200_200_0      | 0.936   | 0.874     | 0.944   | 0.830     | 0.864                | 0.647     | 0.871   | 0.586     | 0.881               | 0.679     | 0.876   | 0.602     |
| cameo_rmsprop_mse_200_400_2      | 0.934   | 0.874     | 0.941   | 0.829     | 0.858                | 0.646     | 0.860   | 0.574     | 0.878               | 0.677     | 0.865   | 0.589     |
| mixed_rmsprop_mse_100_200_8      | 0.935   | 0.874     | 0.942   | 0.829     | 0.862                | 0.646     | 0.869   | 0.581     | 0.881               | 0.679     | 0.873   | 0.598     |
| cameo_rmsprop_mse_200_400_0      | 0.935   | 0.874     | 0.941   | 0.830     | 0.860                | 0.647     | 0.862   | 0.578     | 0.880               | 0.678     | 0.866   | 0.592     |
| cameo_adam_mse_200_200_0         | 0.935   | 0.874     | 0.942   | 0.831     | 0.860                | 0.644     | 0.861   | 0.576     | 0.879               | 0.675     | 0.864   | 0.590     |
| cameo_rmsprop_mse_200_100_0      | 0.935   | 0.873     | 0.942   | 0.832     | 0.862                | 0.646     | 0.861   | 0.581     | 0.881               | 0.678     | 0.865   | 0.595     |
| cameo_rmsprop_mse_100_200_2      | 0.935   | 0.873     | 0.941   | 0.829     | 0.861                | 0.644     | 0.861   | 0.575     | 0.881               | 0.676     | 0.865   | 0.591     |
| cameo_adam_mse_400_100_0         | 0.934   | 0.873     | 0.942   | 0.832     | 0.859                | 0.647     | 0.861   | 0.579     | 0.879               | 0.677     | 0.866   | 0.594     |
| mixed_rmsprop_mse_100_200_0      | 0.935   | 0.873     | 0.944   | 0.829     | 0.863                | 0.647     | 0.871   | 0.586     | 0.882               | 0.678     | 0.876   | 0.602     |
| mixed_rmsprop_mse_100_200_2      | 0.936   | 0.873     | 0.943   | 0.828     | 0.863                | 0.645     | 0.869   | 0.577     | 0.881               | 0.677     | 0.873   | 0.594     |
| mixed_adam_mse_200_400_0         | 0.935   | 0.873     | 0.941   | 0.827     | 0.860                | 0.644     | 0.867   | 0.583     | 0.879               | 0.676     | 0.871   | 0.599     |
| mixed_adam_mse_400_400_0         | 0.935   | 0.873     | 0.941   | 0.830     | 0.862                | 0.643     | 0.865   | 0.582     | 0.880               | 0.675     | 0.870   | 0.599     |
| mixed_rmsprop_mse_200_400_1      | 0.936   | 0.873     | 0.942   | 0.828     | 0.862                | 0.644     | 0.868   | 0.581     | 0.880               | 0.677     | 0.873   | 0.598     |
| cameo_rmsprop_mse_400_100_0      | 0.934   | 0.873     | 0.941   | 0.833     | 0.860                | 0.644     | 0.860   | 0.575     | 0.879               | 0.675     | 0.865   | 0.590     |
| cameo_adam_mse_100_400_0         | 0.935   | 0.873     | 0.942   | 0.832     | 0.861                | 0.644     | 0.860   | 0.576     | 0.880               | 0.676     | 0.864   | 0.590     |
| mixed_rmsprop_mse_400_400_0      | 0.936   | 0.873     | 0.944   | 0.832     | 0.862                | 0.646     | 0.871   | 0.585     | 0.881               | 0.677     | 0.876   | 0.601     |
| cameo_rmsprop_mse_100_100_0      | 0.935   | 0.873     | 0.941   | 0.829     | 0.861                | 0.646     | 0.861   | 0.577     | 0.880               | 0.678     | 0.865   | 0.592     |
| cameo_adam_mse_100_200_0         | 0.934   | 0.873     | 0.941   | 0.829     | 0.860                | 0.644     | 0.862   | 0.581     | 0.879               | 0.676     | 0.864   | 0.594     |
| cameo_rmsprop_mse_400_400_0      | 0.935   | 0.873     | 0.941   | 0.832     | 0.861                | 0.647     | 0.861   | 0.579     | 0.880               | 0.677     | 0.865   | 0.594     |
| mixed_adam_mse_200_200_0         | 0.935   | 0.873     | 0.944   | 0.829     | 0.860                | 0.645     | 0.872   | 0.584     | 0.879               | 0.676     | 0.876   | 0.601     |
| mixed_adam_mse_100_200_0         | 0.935   | 0.872     | 0.942   | 0.827     | 0.862                | 0.645     | 0.868   | 0.579     | 0.880               | 0.676     | 0.873   | 0.595     |
| cameo_adam_mse_100_100_0         | 0.934   | 0.872     | 0.941   | 0.829     | 0.859                | 0.642     | 0.859   | 0.572     | 0.878               | 0.674     | 0.864   | 0.588     |
| cameo_rmsprop_mse_100_100_2      | 0.933   | 0.872     | 0.940   | 0.829     | 0.858                | 0.643     | 0.859   | 0.575     | 0.878               | 0.675     | 0.864   | 0.590     |
| cameo_adam_mse_400_400_0         | 0.934   | 0.872     | 0.940   | 0.830     | 0.857                | 0.641     | 0.858   | 0.575     | 0.877               | 0.673     | 0.863   | 0.590     |
| mixed_rmsprop_absolute_100_100_0 | 0.934   | 0.872     | 0.943   | 0.827     | 0.864                | 0.652     | 0.871   | 0.587     | 0.881               | 0.681     | 0.874   | 0.601     |
| mixed_rmsprop_mse_200_400_8      | 0.935   | 0.872     | 0.942   | 0.828     | 0.862                | 0.644     | 0.867   | 0.577     | 0.880               | 0.676     | 0.872   | 0.593     |
| mixed_rmsprop_absolute_200_400_0 | 0.934   | 0.872     | 0.944   | 0.829     | 0.864                | 0.651     | 0.873   | 0.592     | 0.881               | 0.679     | 0.877   | 0.605     |
| cameo_rmsprop_mse_400_100_2      | 0.934   | 0.872     | 0.941   | 0.828     | 0.857                | 0.643     | 0.860   | 0.571     | 0.878               | 0.673     | 0.864   | 0.587     |
| mixed_adam_mse_100_400_0         | 0.934   | 0.872     | 0.943   | 0.829     | 0.859                | 0.644     | 0.870   | 0.581     | 0.879               | 0.676     | 0.874   | 0.598     |
| mixed_rmsprop_mse_200_100_2      | 0.934   | 0.872     | 0.943   | 0.827     | 0.860                | 0.643     | 0.869   | 0.579     | 0.879               | 0.676     | 0.873   | 0.594     |
| mixed_adam_mse_200_200_2         | 0.934   | 0.872     | 0.943   | 0.828     | 0.860                | 0.643     | 0.868   | 0.581     | 0.879               | 0.673     | 0.873   | 0.595     |
| cameo_adam_mse_200_400_0         | 0.934   | 0.872     | 0.941   | 0.833     | 0.859                | 0.643     | 0.858   | 0.573     | 0.878               | 0.674     | 0.862   | 0.588     |
| cameo_adam_mse_400_400_2         | 0.933   | 0.872     | 0.940   | 0.830     | 0.855                | 0.642     | 0.858   | 0.576     | 0.876               | 0.673     | 0.862   | 0.591     |
| cameo_rmsprop_mse_100_400_1      | 0.934   | 0.871     | 0.941   | 0.832     | 0.859                | 0.642     | 0.859   | 0.577     | 0.879               | 0.675     | 0.863   | 0.591     |
| mixed_rmsprop_mse_100_100_7      | 0.934   | 0.871     | 0.942   | 0.828     | 0.860                | 0.641     | 0.869   | 0.576     | 0.879               | 0.673     | 0.873   | 0.592     |
| mixed_adam_mse_100_200_2         | 0.934   | 0.871     | 0.942   | 0.828     | 0.859                | 0.640     | 0.868   | 0.580     | 0.879               | 0.672     | 0.872   | 0.596     |
| mixed_rmsprop_absolute_100_400_0 | 0.934   | 0.871     | 0.944   | 0.828     | 0.865                | 0.652     | 0.873   | 0.590     | 0.882               | 0.681     | 0.877   | 0.603     |
| cameo_adam_mse_100_400_2         | 0.934   | 0.871     | 0.943   | 0.832     | 0.858                | 0.642     | 0.863   | 0.576     | 0.878               | 0.674     | 0.867   | 0.591     |
| cameo_rmsprop_mse_400_400_2      | 0.933   | 0.871     | 0.941   | 0.829     | 0.856                | 0.640     | 0.860   | 0.571     | 0.877               | 0.673     | 0.865   | 0.586     |
| cameo_rmsprop_absolute_100_400_0 | 0.934   | 0.871     | 0.943   | 0.830     | 0.864                | 0.651     | 0.865   | 0.581     | 0.882               | 0.679     | 0.869   | 0.595     |
| cameo_adam_mse_400_200_0         | 0.933   | 0.871     | 0.942   | 0.829     | 0.856                | 0.642     | 0.862   | 0.573     | 0.877               | 0.675     | 0.867   | 0.588     |
| mixed_rmsprop_mse_400_100_2      | 0.934   | 0.871     | 0.942   | 0.829     | 0.859                | 0.643     | 0.869   | 0.578     | 0.879               | 0.676     | 0.874   | 0.593     |
| mixed_rmsprop_absolute_200_200_0 | 0.934   | 0.871     | 0.944   | 0.831     | 0.864                | 0.651     | 0.873   | 0.589     | 0.881               | 0.680     | 0.878   | 0.604     |
| cameo_rmsprop_mse_200_200_2      | 0.934   | 0.871     | 0.941   | 0.832     | 0.859                | 0.641     | 0.860   | 0.576     | 0.878               | 0.673     | 0.864   | 0.590     |
| cameo_rmsprop_mse_200_100_2      | 0.934   | 0.871     | 0.939   | 0.829     | 0.859                | 0.641     | 0.859   | 0.574     | 0.878               | 0.674     | 0.862   | 0.590     |

Tab. S2. Top performing training parameters/network topologies when validated on CAMEO and CASP12. This is the result of the second optimization round where data points with invalid input features are handled with the NNScorer described in section 2.5 of the main manuscript. The finally used parametrization is highlighted with bold font. The network parameters are equally encoded as in Tab. S1.

| Network Parameters                 | ROC AUC |           |         |           | Spearman Correlation |           |         |           | Pearson Correlation |           |         |           |
|------------------------------------|---------|-----------|---------|-----------|----------------------|-----------|---------|-----------|---------------------|-----------|---------|-----------|
|                                    | CAMEO   |           | CASP12  |           | CAMEO                |           | CASP12  |           | CAMEO               |           | CASP12  |           |
|                                    | Overall | per-model | Overall | per-model | Overall              | per-model | Overall | per-model | Overall             | per-model | Overall | per-model |
| mixed_rmsprop_mse_200_200_0        | 0.940   | 0.874     | 0.945   | 0.815     | 0.873                | 0.654     | 0.833   | 0.559     | 0.889               | 0.686     | 0.855   | 0.569     |
| mixed_rmsprop_mse_100_200_2        | 0.940   | 0.874     | 0.945   | 0.816     | 0.873                | 0.650     | 0.833   | 0.558     | 0.889               | 0.684     | 0.854   | 0.568     |
| mixed_rmsprop_mse_100_200_0        | 0.940   | 0.874     | 0.947   | 0.816     | 0.873                | 0.651     | 0.834   | 0.559     | 0.889               | 0.683     | 0.857   | 0.571     |
| <b>mixed_rmsprop_mse_100_400_0</b> | 0.940   | 0.874     | 0.946   | 0.817     | 0.874                | 0.650     | 0.835   | 0.563     | 0.889               | 0.682     | 0.856   | 0.572     |
| mixed_rmsprop_mse_100_400_2        | 0.940   | 0.874     | 0.945   | 0.815     | 0.874                | 0.650     | 0.833   | 0.556     | 0.889               | 0.683     | 0.855   | 0.567     |
| cameo_rmsprop_mse_100_100_0        | 0.939   | 0.873     | 0.934   | 0.809     | 0.871                | 0.650     | 0.791   | 0.531     | 0.887               | 0.683     | 0.812   | 0.535     |
| mixed_adam_mse_100_400_0           | 0.940   | 0.873     | 0.944   | 0.815     | 0.871                | 0.649     | 0.831   | 0.555     | 0.887               | 0.681     | 0.852   | 0.566     |
| mixed_adam_mse_200_400_0           | 0.938   | 0.873     | 0.944   | 0.814     | 0.870                | 0.649     | 0.829   | 0.555     | 0.886               | 0.681     | 0.852   | 0.565     |
| cameo_rmsprop_mse_100_200_0        | 0.940   | 0.873     | 0.934   | 0.806     | 0.872                | 0.649     | 0.792   | 0.530     | 0.887               | 0.680     | 0.811   | 0.532     |
| mixed_rmsprop_mse_100_100_0        | 0.940   | 0.873     | 0.945   | 0.814     | 0.872                | 0.651     | 0.831   | 0.560     | 0.888               | 0.683     | 0.853   | 0.570     |
| mixed_rmsprop_mse_200_400_0        | 0.940   | 0.873     | 0.945   | 0.816     | 0.873                | 0.648     | 0.832   | 0.559     | 0.889               | 0.680     | 0.853   | 0.569     |
| cameo_rmsprop_mse_400_200_0        | 0.939   | 0.873     | 0.933   | 0.807     | 0.869                | 0.645     | 0.789   | 0.525     | 0.885               | 0.676     | 0.810   | 0.526     |
| mixed_adam_mse_100_200_0           | 0.939   | 0.872     | 0.945   | 0.816     | 0.870                | 0.647     | 0.832   | 0.557     | 0.886               | 0.679     | 0.853   | 0.568     |
| cameo_adam_mse_400_100_0           | 0.938   | 0.872     | 0.932   | 0.807     | 0.868                | 0.645     | 0.785   | 0.523     | 0.884               | 0.676     | 0.808   | 0.524     |
| cameo_rmsprop_mse_200_400_0        | 0.939   | 0.872     | 0.932   | 0.805     | 0.870                | 0.647     | 0.789   | 0.526     | 0.886               | 0.679     | 0.810   | 0.528     |
| mixed_rmsprop_mse_400_100_0        | 0.939   | 0.872     | 0.943   | 0.813     | 0.872                | 0.648     | 0.827   | 0.554     | 0.887               | 0.681     | 0.848   | 0.565     |
| mixed_rmsprop_mse_100_200_8        | 0.939   | 0.872     | 0.944   | 0.816     | 0.871                | 0.649     | 0.832   | 0.557     | 0.887               | 0.681     | 0.853   | 0.567     |
| cameo_rmsprop_mse_100_400_0        | 0.940   | 0.872     | 0.934   | 0.805     | 0.871                | 0.650     | 0.790   | 0.528     | 0.887               | 0.682     | 0.812   | 0.531     |
| mixed_rmsprop_mse_200_400_8        | 0.940   | 0.872     | 0.945   | 0.815     | 0.873                | 0.646     | 0.832   | 0.561     | 0.888               | 0.680     | 0.854   | 0.570     |
| cameo_rmsprop_mse_200_400_2        | 0.938   | 0.872     | 0.934   | 0.804     | 0.868                | 0.647     | 0.789   | 0.525     | 0.885               | 0.680     | 0.811   | 0.529     |
| mixed_rmsprop_mse_100_100_2        | 0.940   | 0.872     | 0.945   | 0.814     | 0.872                | 0.647     | 0.834   | 0.558     | 0.888               | 0.681     | 0.856   | 0.567     |
| cameo_rmsprop_mse_200_100_0        | 0.939   | 0.872     | 0.933   | 0.808     | 0.870                | 0.647     | 0.787   | 0.528     | 0.886               | 0.679     | 0.807   | 0.531     |
| cameo_adam_mse_100_200_0           | 0.938   | 0.872     | 0.933   | 0.806     | 0.867                | 0.646     | 0.788   | 0.527     | 0.884               | 0.677     | 0.810   | 0.529     |
| mixed_adam_mse_100_100_0           | 0.939   | 0.872     | 0.943   | 0.816     | 0.870                | 0.646     | 0.832   | 0.559     | 0.887               | 0.679     | 0.853   | 0.569     |
| cameo_rmsprop_mse_100_400_1        | 0.939   | 0.872     | 0.933   | 0.807     | 0.871                | 0.645     | 0.792   | 0.533     | 0.886               | 0.677     | 0.812   | 0.535     |
| mixed_rmsprop_mse_200_100_0        | 0.940   | 0.872     | 0.945   | 0.817     | 0.872                | 0.650     | 0.831   | 0.561     | 0.888               | 0.681     | 0.853   | 0.573     |
| mixed_adam_mse_400_400_0           | 0.939   | 0.872     | 0.943   | 0.812     | 0.869                | 0.648     | 0.829   | 0.554     | 0.886               | 0.680     | 0.851   | 0.562     |
| cameo_rmsprop_mse_400_400_0        | 0.938   | 0.871     | 0.932   | 0.807     | 0.869                | 0.647     | 0.785   | 0.528     | 0.885               | 0.677     | 0.807   | 0.530     |
| mixed_rmsprop_mse_200_100_2        | 0.939   | 0.871     | 0.945   | 0.815     | 0.871                | 0.647     | 0.832   | 0.555     | 0.887               | 0.680     | 0.854   | 0.566     |
| mixed_rmsprop_mse_200_400_1        | 0.938   | 0.871     | 0.943   | 0.811     | 0.869                | 0.646     | 0.830   | 0.553     | 0.886               | 0.680     | 0.851   | 0.563     |
| mixed_rmsprop_mse_400_400_0        | 0.939   | 0.871     | 0.945   | 0.815     | 0.872                | 0.648     | 0.832   | 0.554     | 0.887               | 0.680     | 0.853   | 0.567     |
| cameo_rmsprop_mse_100_200_2        | 0.939   | 0.871     | 0.934   | 0.806     | 0.870                | 0.644     | 0.795   | 0.533     | 0.886               | 0.677     | 0.816   | 0.537     |
| mixed_rmsprop_mse_400_200_2        | 0.939   | 0.871     | 0.945   | 0.815     | 0.871                | 0.647     | 0.833   | 0.558     | 0.886               | 0.678     | 0.853   | 0.569     |
| cameo_rmsprop_mse_200_200_0        | 0.939   | 0.871     | 0.933   | 0.806     | 0.870                | 0.648     | 0.789   | 0.526     | 0.886               | 0.679     | 0.809   | 0.528     |
| mixed_rmsprop_absolute_100_400_0   | 0.938   | 0.871     | 0.946   | 0.818     | 0.873                | 0.656     | 0.840   | 0.572     | 0.889               | 0.685     | 0.860   | 0.580     |
| cameo_adam_mse_100_100_0           | 0.939   | 0.871     | 0.933   | 0.804     | 0.869                | 0.644     | 0.790   | 0.527     | 0.884               | 0.675     | 0.809   | 0.529     |
| cameo_adam_mse_200_200_0           | 0.938   | 0.871     | 0.931   | 0.804     | 0.867                | 0.644     | 0.784   | 0.528     | 0.884               | 0.675     | 0.804   | 0.529     |
| cameo_adam_mse_200_400_0           | 0.938   | 0.871     | 0.931   | 0.805     | 0.868                | 0.643     | 0.780   | 0.527     | 0.884               | 0.675     | 0.803   | 0.527     |
| cameo_rmsprop_mse_100_100_2        | 0.938   | 0.871     | 0.932   | 0.806     | 0.869                | 0.643     | 0.789   | 0.528     | 0.885               | 0.676     | 0.809   | 0.531     |
| mixed_adam_mse_200_200_0           | 0.938   | 0.871     | 0.943   | 0.814     | 0.868                | 0.647     | 0.830   | 0.554     | 0.885               | 0.679     | 0.850   | 0.564     |
| cameo_rmsprop_mse_200_200_2        | 0.938   | 0.871     | 0.932   | 0.807     | 0.868                | 0.645     | 0.788   | 0.529     | 0.884               | 0.676     | 0.807   | 0.531     |
| cameo_adam_mse_400_400_0           | 0.938   | 0.871     | 0.933   | 0.808     | 0.867                | 0.643     | 0.785   | 0.526     | 0.883               | 0.674     | 0.806   | 0.528     |
| mixed_adam_mse_200_200_2           | 0.939   | 0.870     | 0.944   | 0.814     | 0.869                | 0.646     | 0.830   | 0.556     | 0.886               | 0.678     | 0.851   | 0.565     |
| mixed_rmsprop_mse_100_100_7        | 0.938   | 0.870     | 0.943   | 0.811     | 0.868                | 0.643     | 0.827   | 0.550     | 0.885               | 0.676     | 0.849   | 0.561     |
| mixed_rmsprop_mse_400_100_2        | 0.938   | 0.870     | 0.944   | 0.813     | 0.868                | 0.644     | 0.830   | 0.555     | 0.885               | 0.677     | 0.852   | 0.567     |
| cameo_adam_mse_100_400_2           | 0.937   | 0.870     | 0.930   | 0.803     | 0.864                | 0.642     | 0.788   | 0.529     | 0.882               | 0.673     | 0.808   | 0.531     |
| cameo_rmsprop_mse_400_100_0        | 0.938   | 0.870     | 0.933   | 0.807     | 0.869                | 0.643     | 0.787   | 0.527     | 0.885               | 0.675     | 0.809   | 0.529     |
| cameo_adam_mse_100_400_0           | 0.938   | 0.870     | 0.930   | 0.806     | 0.867                | 0.644     | 0.784   | 0.525     | 0.884               | 0.676     | 0.804   | 0.527     |
| mixed_adam_mse_100_200_2           | 0.938   | 0.870     | 0.944   | 0.813     | 0.868                | 0.646     | 0.832   | 0.556     | 0.885               | 0.677     | 0.853   | 0.564     |
| cameo_rmsprop_mse_100_400_2        | 0.938   | 0.870     | 0.933   | 0.805     | 0.867                | 0.645     | 0.789   | 0.526     | 0.884               | 0.677     | 0.811   | 0.529     |
| mixed_rmsprop_absolute_200_200_0   | 0.939   | 0.869     | 0.944   | 0.814     | 0.873                | 0.653     | 0.835   | 0.566     | 0.889               | 0.681     | 0.854   | 0.574     |
| cameo_rmsprop_mse_400_100_2        | 0.938   | 0.869     | 0.932   | 0.804     | 0.868                | 0.642     | 0.786   | 0.525     | 0.884               | 0.673     | 0.807   | 0.526     |
| cameo_adam_mse_400_400_2           | 0.937   | 0.869     | 0.932   | 0.808     | 0.866                | 0.643     | 0.787   | 0.530     | 0.883               | 0.673     | 0.807   | 0.531     |
| mixed_rmsprop_absolute_200_400_0   | 0.938   | 0.869     | 0.945   | 0.814     | 0.873                | 0.653     | 0.835   | 0.564     | 0.888               | 0.682     | 0.854   | 0.573     |
| cameo_rmsprop_mse_200_100_2        | 0.938   | 0.868     | 0.933   | 0.805     | 0.867                | 0.639     | 0.788   | 0.532     | 0.883               | 0.671     | 0.808   | 0.534     |
| mixed_rmsprop_absolute_100_100_0   | 0.939   | 0.868     | 0.946   | 0.814     | 0.874                | 0.653     | 0.837   | 0.563     | 0.889               | 0.681     | 0.857   | 0.572     |
| cameo_rmsprop_mse_400_400_2        | 0.937   | 0.868     | 0.931   | 0.808     | 0.865                | 0.641     | 0.786   | 0.529     | 0.882               | 0.672     | 0.804   | 0.532     |
| cameo_rmsprop_absolute_100_400_0   | 0.938   | 0.868     | 0.933   | 0.807     | 0.873                | 0.650     | 0.796   | 0.540     | 0.888               | 0.679     | 0.814   | 0.542     |
| cameo_adam_mse_400_200_0           | 0.937   | 0.868     | 0.931   | 0.805     | 0.864                | 0.640     | 0.783   | 0.521     | 0.880               | 0.671     | 0.803   | 0.523     |

Tab. S3. Impact of using neural networks instead of linear combinations and gradually adding more features specific to QMEANDisCo. Predictors and evaluation procedure is described in supplemental section "Neural Networks and Additional Features".

| Predictor                    | ROC AUC |           |         |           | Spearman Correlation |           |         |           | Pearson Correlation |           |         |           |
|------------------------------|---------|-----------|---------|-----------|----------------------|-----------|---------|-----------|---------------------|-----------|---------|-----------|
|                              | CAMEO   |           | CASP12  |           | CAMEO                |           | CASP12  |           | CAMEO               |           | CASP12  |           |
|                              | Overall | per-model | Overall | per-model | Overall              | per-model | Overall | per-model | Overall             | per-model | Overall | per-model |
| Linear Combination (QMEAN 3) | 0.872   | 0.822     | 0.863   | 0.794     | 0.708                | 0.531     | 0.663   | 0.491     | 0.725               | 0.558     | 0.637   | 0.497     |
| basic                        | 0.878   | 0.824     | 0.878   | 0.784     | 0.722                | 0.534     | 0.704   | 0.490     | 0.756               | 0.563     | 0.711   | 0.500     |
| plus_4                       | 0.884   | 0.828     | 0.887   | 0.786     | 0.733                | 0.542     | 0.721   | 0.485     | 0.766               | 0.570     | 0.732   | 0.497     |
| plus_avg                     | 0.902   | 0.833     | 0.911   | 0.786     | 0.783                | 0.563     | 0.767   | 0.513     | 0.808               | 0.589     | 0.785   | 0.522     |
| full (QMEANDisCo 3)          | 0.940   | 0.874     | 0.946   | 0.817     | 0.874                | 0.650     | 0.835   | 0.563     | 0.889               | 0.682     | 0.856   | 0.572     |

Tab. S4. Performances of the input features described in sections 2.3 and 2.4 of the main manuscript when applied on the data sets used for cross-validation

| Feature                         | ROC AUC |           |         |           | Spearman Correlation |           |         |           | Pearson Correlation |           |         |           |
|---------------------------------|---------|-----------|---------|-----------|----------------------|-----------|---------|-----------|---------------------|-----------|---------|-----------|
|                                 | CAMEO   |           | CASP12  |           | CAMEO                |           | CASP12  |           | CAMEO               |           | CASP12  |           |
|                                 | Overall | per-model | Overall | per-model | Overall              | per-model | Overall | per-model | Overall             | per-model | Overall | per-model |
| All-Atom Interaction Potential  | 0.799   | 0.733     | 0.779   | 0.725     | -0.551               | -0.327    | -0.494  | -0.289    | -0.520              | -0.342    | -0.462  | -0.303    |
| CB Interaction Potential        | 0.734   | 0.638     | 0.736   | 0.640     | -0.443               | -0.186    | -0.371  | -0.153    | -0.419              | -0.199    | -0.342  | -0.162    |
| Packing Potential               | 0.728   | 0.673     | 0.773   | 0.688     | -0.403               | -0.246    | -0.516  | -0.283    | -0.455              | -0.291    | -0.448  | -0.305    |
| Torsion Potential               | 0.755   | 0.682     | 0.724   | 0.661     | -0.481               | -0.247    | -0.345  | -0.203    | -0.475              | -0.282    | -0.332  | -0.218    |
| Solvent Accessibility Agreement | 0.628   | 0.603     | 0.649   | 0.600     | 0.252                | 0.177     | 0.284   | 0.175     | 0.282               | 0.182     | 0.305   | 0.173     |
| Secondary Structure Agreement   | 0.735   | 0.688     | 0.794   | 0.694     | 0.407                | 0.284     | 0.517   | 0.281     | 0.475               | 0.301     | 0.453   | 0.280     |
| Solvent Accessibility           | 0.694   | 0.733     | 0.685   | 0.647     | -0.381               | -0.398    | -0.370  | -0.334    | -0.423              | -0.425    | -0.385  | -0.347    |
| CB Packing Potential            | 0.704   | 0.631     | 0.742   | 0.643     | -0.351               | -0.187    | -0.461  | -0.233    | -0.398              | -0.234    | -0.396  | -0.255    |
| Reduced Potential               | 0.752   | 0.668     | 0.778   | 0.677     | -0.457               | -0.232    | -0.473  | -0.214    | -0.493              | -0.266    | -0.470  | -0.233    |
| Clash Score                     | 0.567   | 0.520     | 0.538   | 0.521     | -0.172               | -0.043    | -0.073  | -0.004    | -0.160              | -0.074    | -0.164  | -0.048    |
| N                               | 0.654   | 0.706     | 0.650   | 0.625     | 0.304                | 0.359     | 0.319   | 0.317     | 0.316               | 0.368     | 0.297   | 0.313     |
| DisCo                           | 0.890   | 0.824     | 0.891   | 0.778     | 0.773                | 0.513     | 0.683   | 0.365     | 0.788               | 0.554     | 0.693   | 0.380     |

Tab. S5. Result of the full training parameter/network topology optimization described in section 2.5 of the main manuscript. The provided results are conceptually equal to the results in Tab. S2 with the difference that only CASP12 has been used for training.

| Network Parameters              | ROC AUC |           |         |           | Spearman Correlation |           |         |           | Pearson Correlation |           |         |           |
|---------------------------------|---------|-----------|---------|-----------|----------------------|-----------|---------|-----------|---------------------|-----------|---------|-----------|
|                                 | CAMEO   |           | CASP12  |           | CAMEO                |           | CASP12  |           | CAMEO               |           | CASP12  |           |
|                                 | Overall | per-model | Overall | per-model | Overall              | per-model | Overall | per-model | Overall             | per-model | Overall | per-model |
| casp_rmsprop_mse_100_200_0      | 0.915   | 0.856     | 0.939   | 0.809     | 0.800                | 0.600     | 0.828   | 0.545     | 0.838               | 0.640     | 0.842   | 0.561     |
| casp_rmsprop_absolute_100_200_0 | 0.923   | 0.855     | 0.943   | 0.808     | 0.821                | 0.607     | 0.836   | 0.552     | 0.855               | 0.644     | 0.854   | 0.568     |
| casp_rmsprop_absolute_100_100_0 | 0.924   | 0.854     | 0.942   | 0.808     | 0.828                | 0.606     | 0.834   | 0.548     | 0.857               | 0.643     | 0.851   | 0.564     |
| casp_rmsprop_absolute_100_400_2 | 0.922   | 0.853     | 0.940   | 0.800     | 0.821                | 0.604     | 0.833   | 0.542     | 0.852               | 0.643     | 0.845   | 0.555     |
| casp_rmsprop_absolute_100_400_0 | 0.924   | 0.853     | 0.942   | 0.809     | 0.828                | 0.608     | 0.836   | 0.548     | 0.859               | 0.644     | 0.854   | 0.565     |
| casp_rmsprop_mse_100_200_2      | 0.920   | 0.853     | 0.941   | 0.806     | 0.810                | 0.595     | 0.829   | 0.541     | 0.845               | 0.634     | 0.847   | 0.559     |
| casp_rmsprop_mse_100_400_0      | 0.917   | 0.853     | 0.937   | 0.811     | 0.805                | 0.603     | 0.827   | 0.546     | 0.841               | 0.639     | 0.836   | 0.561     |
| casp_rmsprop_absolute_100_400_1 | 0.923   | 0.852     | 0.943   | 0.805     | 0.827                | 0.603     | 0.834   | 0.547     | 0.858               | 0.642     | 0.851   | 0.561     |
| casp_rmsprop_mse_200_400_0      | 0.915   | 0.852     | 0.938   | 0.801     | 0.802                | 0.597     | 0.826   | 0.534     | 0.838               | 0.632     | 0.842   | 0.549     |
| casp_rmsprop_absolute_400_400_0 | 0.919   | 0.852     | 0.941   | 0.803     | 0.816                | 0.599     | 0.831   | 0.546     | 0.848               | 0.636     | 0.849   | 0.558     |
| casp_rmsprop_mse_100_400_2      | 0.919   | 0.851     | 0.939   | 0.805     | 0.809                | 0.591     | 0.828   | 0.538     | 0.844               | 0.630     | 0.844   | 0.554     |
| casp_rmsprop_mse_100_400_8      | 0.915   | 0.851     | 0.941   | 0.804     | 0.796                | 0.593     | 0.829   | 0.537     | 0.837               | 0.632     | 0.848   | 0.552     |
| casp_adam_absolute_100_400_0    | 0.921   | 0.850     | 0.940   | 0.807     | 0.821                | 0.597     | 0.831   | 0.543     | 0.853               | 0.631     | 0.828   | 0.559     |
| casp_rmsprop_absolute_100_200_1 | 0.921   | 0.850     | 0.938   | 0.797     | 0.822                | 0.595     | 0.829   | 0.539     | 0.852               | 0.633     | 0.845   | 0.554     |
| casp_rmsprop_absolute_100_400_7 | 0.919   | 0.850     | 0.941   | 0.803     | 0.810                | 0.598     | 0.831   | 0.543     | 0.845               | 0.635     | 0.851   | 0.560     |
| casp_rmsprop_absolute_200_200_0 | 0.919   | 0.850     | 0.940   | 0.803     | 0.817                | 0.597     | 0.830   | 0.542     | 0.849               | 0.635     | 0.847   | 0.559     |
| casp_rmsprop_absolute_200_400_0 | 0.923   | 0.850     | 0.943   | 0.809     | 0.828                | 0.602     | 0.835   | 0.550     | 0.857               | 0.638     | 0.854   | 0.565     |
| casp_rmsprop_mse_200_200_0      | 0.911   | 0.849     | 0.913   | 0.794     | 0.786                | 0.589     | 0.798   | 0.531     | 0.824               | 0.625     | 0.802   | 0.546     |
| casp_rmsprop_mse_100_100_0      | 0.917   | 0.849     | 0.931   | 0.804     | 0.809                | 0.589     | 0.818   | 0.539     | 0.841               | 0.624     | 0.833   | 0.554     |
| casp_rmsprop_absolute_100_200_2 | 0.916   | 0.849     | 0.941   | 0.804     | 0.798                | 0.599     | 0.833   | 0.544     | 0.839               | 0.638     | 0.851   | 0.559     |
| casp_rmsprop_mse_200_100_0      | 0.914   | 0.849     | 0.936   | 0.801     | 0.805                | 0.589     | 0.822   | 0.535     | 0.833               | 0.624     | 0.836   | 0.550     |
| casp_rmsprop_absolute_400_100_0 | 0.920   | 0.849     | 0.922   | 0.795     | 0.819                | 0.592     | 0.810   | 0.533     | 0.850               | 0.630     | 0.816   | 0.549     |
| casp_rmsprop_absolute_100_400_8 | 0.920   | 0.848     | 0.938   | 0.805     | 0.818                | 0.595     | 0.829   | 0.545     | 0.851               | 0.635     | 0.844   | 0.559     |
| casp_rmsprop_absolute_200_400_8 | 0.918   | 0.848     | 0.936   | 0.803     | 0.813                | 0.595     | 0.826   | 0.545     | 0.847               | 0.634     | 0.842   | 0.558     |
| casp_adam_absolute_100_200_0    | 0.920   | 0.848     | 0.935   | 0.801     | 0.817                | 0.598     | 0.824   | 0.536     | 0.851               | 0.634     | 0.841   | 0.552     |
| casp_rmsprop_mse_100_100_2      | 0.914   | 0.848     | 0.934   | 0.796     | 0.801                | 0.589     | 0.821   | 0.532     | 0.837               | 0.626     | 0.835   | 0.545     |
| casp_rmsprop_absolute_100_200_7 | 0.917   | 0.847     | 0.942   | 0.802     | 0.801                | 0.589     | 0.832   | 0.537     | 0.839               | 0.627     | 0.842   | 0.554     |
| casp_adam_absolute_200_400_0    | 0.917   | 0.847     | 0.938   | 0.799     | 0.814                | 0.594     | 0.824   | 0.533     | 0.846               | 0.626     | 0.841   | 0.550     |
| casp_rmsprop_absolute_200_400_1 | 0.919   | 0.847     | 0.942   | 0.802     | 0.816                | 0.588     | 0.832   | 0.544     | 0.846               | 0.627     | 0.849   | 0.558     |
| casp_rmsprop_absolute_100_200_8 | 0.921   | 0.847     | 0.943   | 0.801     | 0.823                | 0.593     | 0.833   | 0.538     | 0.854               | 0.633     | 0.852   | 0.557     |
| casp_rmsprop_mse_100_400_1      | 0.917   | 0.847     | 0.939   | 0.803     | 0.808                | 0.587     | 0.828   | 0.533     | 0.842               | 0.625     | 0.844   | 0.551     |
| casp_rmsprop_absolute_100_100_8 | 0.919   | 0.847     | 0.939   | 0.801     | 0.814                | 0.591     | 0.829   | 0.538     | 0.849               | 0.632     | 0.846   | 0.556     |
| casp_rmsprop_absolute_200_400_2 | 0.915   | 0.846     | 0.938   | 0.804     | 0.798                | 0.589     | 0.827   | 0.542     | 0.836               | 0.628     | 0.841   | 0.556     |
| casp_rmsprop_absolute_100_100_2 | 0.921   | 0.846     | 0.941   | 0.801     | 0.815                | 0.593     | 0.832   | 0.544     | 0.850               | 0.630     | 0.850   | 0.559     |
| casp_adam_absolute_100_100_0    | 0.919   | 0.846     | 0.939   | 0.802     | 0.821                | 0.595     | 0.826   | 0.542     | 0.852               | 0.629     | 0.847   | 0.556     |
| casp_adam_mse_100_100_0         | 0.917   | 0.846     | 0.932   | 0.793     | 0.809                | 0.582     | 0.818   | 0.521     | 0.842               | 0.618     | 0.832   | 0.538     |
| casp_adam_mse_100_400_0         | 0.917   | 0.846     | 0.938   | 0.804     | 0.806                | 0.587     | 0.820   | 0.530     | 0.840               | 0.619     | 0.839   | 0.543     |
| casp_rmsprop_mse_100_100_8      | 0.911   | 0.845     | 0.934   | 0.801     | 0.786                | 0.579     | 0.822   | 0.531     | 0.826               | 0.618     | 0.836   | 0.546     |
| casp_rmsprop_absolute_200_200_2 | 0.914   | 0.845     | 0.939   | 0.802     | 0.795                | 0.586     | 0.827   | 0.541     | 0.834               | 0.624     | 0.846   | 0.555     |
| casp_adam_mse_200_200_0         | 0.909   | 0.845     | 0.897   | 0.792     | 0.791                | 0.584     | 0.775   | 0.519     | 0.827               | 0.617     | 0.776   | 0.528     |
| casp_rmsprop_mse_100_400_7      | 0.914   | 0.845     | 0.938   | 0.801     | 0.784                | 0.577     | 0.824   | 0.530     | 0.829               | 0.617     | 0.832   | 0.547     |
| casp_rmsprop_absolute_200_100_0 | 0.912   | 0.845     | 0.936   | 0.802     | 0.792                | 0.590     | 0.826   | 0.541     | 0.828               | 0.624     | 0.836   | 0.555     |
| casp_rmsprop_mse_200_200_2      | 0.914   | 0.844     | 0.933   | 0.794     | 0.797                | 0.581     | 0.821   | 0.532     | 0.836               | 0.621     | 0.834   | 0.546     |
| casp_rmsprop_absolute_100_200_5 | 0.918   | 0.844     | 0.937   | 0.791     | 0.815                | 0.584     | 0.825   | 0.531     | 0.846               | 0.623     | 0.844   | 0.544     |
| casp_rmsprop_absolute_100_400_5 | 0.914   | 0.844     | 0.938   | 0.794     | 0.804                | 0.583     | 0.827   | 0.533     | 0.832               | 0.624     | 0.846   | 0.548     |
| casp_adam_absolute_200_100_0    | 0.918   | 0.844     | 0.937   | 0.797     | 0.815                | 0.588     | 0.827   | 0.541     | 0.845               | 0.622     | 0.842   | 0.552     |
| casp_rmsprop_absolute_400_200_0 | 0.919   | 0.843     | 0.937   | 0.799     | 0.818                | 0.588     | 0.828   | 0.537     | 0.848               | 0.624     | 0.844   | 0.552     |
| casp_rmsprop_mse_100_400_3      | 0.914   | 0.843     | 0.942   | 0.802     | 0.791                | 0.579     | 0.828   | 0.534     | 0.831               | 0.618     | 0.850   | 0.552     |
| casp_rmsprop_absolute_200_400_7 | 0.916   | 0.843     | 0.940   | 0.802     | 0.801                | 0.584     | 0.830   | 0.537     | 0.840               | 0.621     | 0.848   | 0.553     |
| casp_rmsprop_mse_100_100_1      | 0.912   | 0.843     | 0.936   | 0.800     | 0.792                | 0.575     | 0.824   | 0.531     | 0.831               | 0.613     | 0.841   | 0.546     |
| casp_adam_absolute_100_200_1    | 0.910   | 0.843     | 0.931   | 0.799     | 0.796                | 0.587     | 0.818   | 0.536     | 0.830               | 0.620     | 0.832   | 0.547     |
| casp_rmsprop_absolute_100_400_3 | 0.918   | 0.843     | 0.940   | 0.801     | 0.811                | 0.585     | 0.830   | 0.533     | 0.847               | 0.625     | 0.848   | 0.551     |
| casp_rmsprop_mse_100_200_1      | 0.915   | 0.843     | 0.938   | 0.803     | 0.802                | 0.574     | 0.826   | 0.533     | 0.835               | 0.615     | 0.843   | 0.548     |
| casp_rmsprop_absolute_400_200_8 | 0.915   | 0.843     | 0.937   | 0.796     | 0.809                | 0.581     | 0.828   | 0.539     | 0.841               | 0.619     | 0.838   | 0.549     |
| casp_rmsprop_mse_200_400_2      | 0.912   | 0.843     | 0.929   | 0.793     | 0.796                | 0.577     | 0.813   | 0.526     | 0.830               | 0.616     | 0.831   | 0.539     |
| casp_rmsprop_absolute_200_100_8 | 0.917   | 0.842     | 0.937   | 0.803     | 0.806                | 0.577     | 0.827   | 0.536     | 0.844               | 0.618     | 0.841   | 0.548     |
| casp_rmsprop_mse_100_200_8      | 0.910   | 0.841     | 0.935   | 0.797     | 0.789                | 0.573     | 0.826   | 0.534     | 0.828               | 0.615     | 0.842   | 0.547     |
| casp_rmsprop_absolute_100_100_7 | 0.916   | 0.841     | 0.940   | 0.798     | 0.802                | 0.579     | 0.830   | 0.530     | 0.840               | 0.616     | 0.848   | 0.549     |
| casp_rmsprop_absolute_100_200_3 | 0.919   | 0.841     | 0.941   | 0.804     | 0.808                | 0.582     | 0.828   | 0.535     | 0.844               | 0.620     | 0.849   | 0.551     |
| casp_rmsprop_mse_200_400_1      | 0.917   | 0.841     | 0.930   | 0.796     | 0.807                | 0.573     | 0.817   | 0.525     | 0.840               | 0.610     | 0.830   | 0.538     |
| casp_adam_mse_400_100_0         | 0.914   | 0.840     | 0.933   | 0.798     | 0.805                | 0.575     | 0.815   | 0.522     | 0.834               | 0.605     | 0.834   | 0.536     |
| casp_rmsprop_absolute_200_200_7 | 0.916   | 0.840     | 0.935   | 0.795     | 0.804                | 0.576     | 0.824   | 0.529     | 0.840               | 0.613     | 0.840   | 0.543     |

|                                 |       |       |       |       |       |       |       |       |       |       |       |       |
|---------------------------------|-------|-------|-------|-------|-------|-------|-------|-------|-------|-------|-------|-------|
| casp_rmsprop_absolute_100_100_1 | 0.918 | 0.840 | 0.942 | 0.801 | 0.810 | 0.578 | 0.833 | 0.536 | 0.847 | 0.618 | 0.851 | 0.553 |
| casp_adam_absolute_400_200_0    | 0.910 | 0.840 | 0.935 | 0.787 | 0.789 | 0.579 | 0.823 | 0.521 | 0.827 | 0.611 | 0.840 | 0.535 |
| casp_adam_mse_100_200_0         | 0.906 | 0.840 | 0.889 | 0.787 | 0.779 | 0.574 | 0.768 | 0.516 | 0.803 | 0.609 | 0.768 | 0.529 |
| casp_adam_absolute_200_100_8    | 0.912 | 0.839 | 0.930 | 0.793 | 0.801 | 0.578 | 0.819 | 0.523 | 0.837 | 0.613 | 0.830 | 0.539 |
| casp_rmsprop_mse_100_200_3      | 0.911 | 0.839 | 0.933 | 0.796 | 0.780 | 0.566 | 0.817 | 0.523 | 0.821 | 0.605 | 0.836 | 0.538 |
| casp_rmsprop_absolute_400_400_2 | 0.911 | 0.839 | 0.932 | 0.794 | 0.793 | 0.578 | 0.823 | 0.531 | 0.830 | 0.612 | 0.825 | 0.544 |
| casp_rmsprop_absolute_400_400_1 | 0.914 | 0.838 | 0.941 | 0.804 | 0.793 | 0.573 | 0.831 | 0.537 | 0.837 | 0.611 | 0.849 | 0.553 |
| casp_rmsprop_absolute_200_100_1 | 0.911 | 0.838 | 0.939 | 0.802 | 0.792 | 0.572 | 0.829 | 0.536 | 0.829 | 0.606 | 0.845 | 0.552 |
| casp_adam_mse_100_200_2         | 0.913 | 0.837 | 0.928 | 0.793 | 0.793 | 0.574 | 0.814 | 0.525 | 0.833 | 0.607 | 0.828 | 0.537 |
| casp_adam_mse_400_400_0         | 0.911 | 0.837 | 0.932 | 0.790 | 0.795 | 0.567 | 0.810 | 0.514 | 0.828 | 0.604 | 0.823 | 0.530 |
| casp_rmsprop_absolute_200_200_1 | 0.917 | 0.836 | 0.937 | 0.796 | 0.805 | 0.573 | 0.827 | 0.536 | 0.844 | 0.611 | 0.842 | 0.550 |
| casp_rmsprop_mse_200_200_7      | 0.908 | 0.836 | 0.939 | 0.799 | 0.777 | 0.563 | 0.822 | 0.524 | 0.814 | 0.602 | 0.836 | 0.540 |
| casp_rmsprop_absolute_200_100_2 | 0.910 | 0.835 | 0.930 | 0.796 | 0.789 | 0.576 | 0.819 | 0.535 | 0.828 | 0.611 | 0.833 | 0.545 |
| casp_rmsprop_absolute_200_200_8 | 0.911 | 0.835 | 0.939 | 0.798 | 0.796 | 0.567 | 0.829 | 0.534 | 0.834 | 0.609 | 0.847 | 0.551 |



Tab. S6. Performance evaluation on CAMEO data (data collected during 12 weeks, CAMEO QE-submission dates from 2018-12-01 to 2019-03-02)

| Method             | ROC AUC |           | abs(Spearman Correlation) |           | abs(Pearson Correlation) |           |
|--------------------|---------|-----------|---------------------------|-----------|--------------------------|-----------|
|                    | Overall | per-model | Overall                   | per-model | Overall                  | per-model |
| EQuant 2           | 0.704   | 0.715     | 0.366                     | 0.319     | 0.434                    | 0.376     |
| Baseline Potential | 0.771   | 0.712     | 0.474                     | 0.278     | 0.498                    | 0.314     |
| VoroMQA_sw5        | 0.808   | 0.774     | 0.524                     | 0.397     | 0.596                    | 0.447     |
| VoroMQA_v2         | 0.817   | 0.766     | 0.550                     | 0.392     | 0.578                    | 0.416     |
| ProQ2              | 0.855   | 0.786     | 0.611                     | 0.439     | 0.633                    | 0.467     |
| ProQ3D             | 0.856   | 0.804     | 0.608                     | 0.461     | 0.419                    | 0.500     |
| QMEAN 3            | 0.870   | 0.826     | 0.669                     | 0.521     | 0.721                    | 0.562     |
| ModFOLD6           | 0.878   | 0.837     | 0.660                     | 0.527     | 0.668                    | 0.583     |
| ProQ3              | 0.882   | 0.821     | 0.659                     | 0.489     | 0.442                    | 0.485     |
| ProQ3D_LDDT        | 0.897   | 0.837     | 0.705                     | 0.548     | 0.763                    | 0.598     |
| ModFOLD7_IDDT      | 0.903   | 0.844     | 0.711                     | 0.529     | 0.782                    | 0.615     |
| QMEANDisCo 2.5.1   | 0.934   | 0.868     | 0.826                     | 0.594     | 0.857                    | 0.645     |
| QMEANDisCo 3       | 0.942   | 0.876     | 0.845                     | 0.644     | 0.883                    | 0.685     |

Tab. S7. Performance evaluation on the full CASP13 data set (submission stage 2) and on a high quality subset of the same data only originating from models with global IDDT > 0.6. Results for QMEANDisCo 3 have been generated retrospectively. When constructing DisCo, we excluded all homologues released after the CASP13 submission deadline of the corresponding EMA targets.

| Method              | ROC AUC       |           |                     |           | abs(Spearman Correlation) |           |                     |           | abs(Pearson Correlation) |           |                     |           |
|---------------------|---------------|-----------|---------------------|-----------|---------------------------|-----------|---------------------|-----------|--------------------------|-----------|---------------------|-----------|
|                     | Full Data Set |           | High Quality Subset |           | Full Data Set             |           | High Quality Subset |           | Full Data Set            |           | High Quality Subset |           |
|                     | Overall       | per-model | Overall             | per-model | Overall                   | per-model | Overall             | per-model | Overall                  | per-model | Overall             | per-model |
| 3DCNN               | 0.753         | 0.709     | 0.741               | 0.750     | 0.489                     | 0.366     | 0.395               | 0.367     | 0.109                    | 0.331     | 0.406               | 0.400     |
| MULTICOM-NOVEL      | 0.781         | 0.618     | 0.652               | 0.644     | 0.550                     | 0.211     | 0.205               | 0.200     | 0.516                    | 0.216     | 0.257               | 0.248     |
| RaptorX-DeepQA      | 0.794         | 0.708     | 0.742               | 0.784     | 0.592                     | 0.414     | 0.319               | 0.399     | 0.271                    | 0.395     | 0.274               | 0.465     |
| MASS1               | 0.799         | 0.682     | 0.769               | 0.759     | 0.595                     | 0.370     | 0.417               | 0.363     | 0.436                    | 0.367     | 0.428               | 0.423     |
| MASS2               | 0.799         | 0.682     | 0.769               | 0.759     | 0.595                     | 0.370     | 0.417               | 0.364     | 0.438                    | 0.367     | 0.428               | 0.423     |
| NAIVE               | 0.815         | NaN       | 0.598               | NaN       | 0.608                     | NaN       | 0.129               | NaN       | 0.594                    | NaN       | 0.094               | NaN       |
| VoroMQA-B           | 0.821         | 0.688     | 0.776               | 0.762     | 0.633                     | 0.385     | 0.420               | 0.357     | 0.474                    | 0.363     | 0.433               | 0.415     |
| VoroMQA-A           | 0.822         | 0.691     | 0.778               | 0.764     | 0.631                     | 0.389     | 0.416               | 0.355     | 0.466                    | 0.365     | 0.432               | 0.413     |
| Pcons               | 0.830         | 0.704     | 0.731               | 0.801     | 0.651                     | 0.416     | 0.307               | 0.466     | 0.625                    | 0.425     | 0.247               | 0.553     |
| ProQ3D-TM           | 0.831         | 0.715     | 0.778               | 0.797     | 0.652                     | 0.418     | 0.443               | 0.422     | 0.386                    | 0.423     | 0.369               | 0.509     |
| SASHAN              | 0.833         | 0.694     | 0.753               | 0.735     | 0.656                     | 0.373     | 0.415               | 0.361     | 0.559                    | 0.364     | 0.435               | 0.390     |
| ProQ4               | 0.845         | 0.740     | 0.789               | 0.797     | 0.689                     | 0.456     | 0.446               | 0.437     | 0.640                    | 0.467     | 0.475               | 0.495     |
| ProQ2               | 0.848         | 0.697     | 0.769               | 0.777     | 0.673                     | 0.378     | 0.403               | 0.394     | 0.548                    | 0.378     | 0.414               | 0.458     |
| Davis-EMAcconsensus | 0.852         | 0.747     | 0.766               | 0.823     | 0.698                     | 0.487     | 0.363               | 0.477     | 0.532                    | 0.480     | 0.345               | 0.566     |
| ModFOLDclust2       | 0.857         | 0.747     | 0.783               | 0.824     | 0.700                     | 0.490     | 0.405               | 0.486     | 0.657                    | 0.499     | 0.336               | 0.577     |
| Wallner             | 0.859         | 0.726     | 0.739               | 0.831     | 0.712                     | 0.447     | 0.314               | 0.485     | 0.677                    | 0.464     | 0.376               | 0.586     |
| ProQ3D              | 0.862         | 0.725     | 0.799               | 0.800     | 0.701                     | 0.431     | 0.471               | 0.439     | 0.348                    | 0.419     | 0.332               | 0.522     |
| UOSHAN              | 0.863         | 0.730     | 0.803               | 0.807     | 0.709                     | 0.465     | 0.486               | 0.478     | 0.662                    | 0.469     | 0.472               | 0.553     |
| ModFOLD7            | 0.867         | 0.741     | 0.790               | 0.824     | 0.717                     | 0.478     | 0.437               | 0.473     | 0.679                    | 0.492     | 0.398               | 0.565     |
| ModFOLD7_rank       | 0.867         | 0.741     | 0.790               | 0.824     | 0.717                     | 0.478     | 0.437               | 0.473     | 0.679                    | 0.492     | 0.398               | 0.565     |
| Pcomb               | 0.868         | 0.750     | 0.757               | 0.840     | 0.740                     | 0.506     | 0.345               | 0.517     | 0.666                    | 0.522     | 0.425               | 0.612     |
| LamoureuxLab        | 0.875         | 0.716     | 0.749               | 0.782     | 0.708                     | 0.403     | 0.415               | 0.404     | 0.709                    | 0.427     | 0.439               | 0.477     |
| ModFOLD7_cor        | 0.876         | 0.768     | 0.788               | 0.841     | 0.742                     | 0.510     | 0.447               | 0.518     | 0.679                    | 0.537     | 0.384               | 0.616     |
| ProQ3               | 0.878         | 0.735     | 0.817               | 0.816     | 0.714                     | 0.450     | 0.496               | 0.466     | 0.357                    | 0.380     | 0.286               | 0.504     |
| ProQ3D-CAD          | 0.894         | 0.769     | 0.842               | 0.830     | 0.738                     | 0.483     | 0.582               | 0.528     | 0.741                    | 0.495     | 0.620               | 0.578     |
| ProQ3D-IDDT         | 0.901         | 0.772     | 0.838               | 0.847     | 0.766                     | 0.520     | 0.591               | 0.558     | 0.768                    | 0.537     | 0.621               | 0.623     |
| CPClab              | 0.909         | 0.793     | 0.847               | 0.854     | 0.718                     | 0.446     | 0.606               | 0.578     | 0.741                    | 0.472     | 0.636               | 0.638     |
| FaeNNz              | 0.933         | 0.783     | 0.876               | 0.842     | 0.824                     | 0.537     | 0.730               | 0.600     | 0.833                    | 0.546     | 0.742               | 0.637     |
| QMEANDisCo3         | 0.934         | 0.792     | 0.880               | 0.862     | 0.824                     | 0.538     | 0.719               | 0.607     | 0.833                    | 0.549     | 0.737               | 0.649     |

Tab. S8. Model length dependent estimation of expected prediction error based on global CAMEO evaluation. For each model length  $l$ , data points from models of length  $l \pm 40$  are considered.

| Model Length | N Data Points | Expected Error | Model Length | N Data Points | Expected Error |
|--------------|---------------|----------------|--------------|---------------|----------------|
| 40           | 881           | 0.115          | 225          | 1198          | 0.056          |
| 45           | 970           | 0.115          | 230          | 1207          | 0.055          |
| 50           | 1040          | 0.112          | 235          | 1208          | 0.054          |
| 55           | 1075          | 0.111          | 240          | 1196          | 0.051          |
| 60           | 1152          | 0.109          | 245          | 1185          | 0.052          |
| 65           | 1238          | 0.108          | 250          | 1179          | 0.053          |
| 70           | 1359          | 0.107          | 255          | 1187          | 0.052          |
| 75           | 1346          | 0.105          | 260          | 1193          | 0.052          |
| 80           | 1396          | 0.096          | 265          | 1195          | 0.051          |
| 85           | 1505          | 0.093          | 270          | 1212          | 0.051          |
| 90           | 1531          | 0.092          | 275          | 1201          | 0.05           |
| 95           | 1535          | 0.088          | 280          | 1221          | 0.051          |
| 100          | 1516          | 0.08           | 285          | 1256          | 0.051          |
| 105          | 1585          | 0.078          | 290          | 1247          | 0.052          |
| 110          | 1575          | 0.078          | 295          | 1193          | 0.052          |
| 115          | 1560          | 0.078          | 300          | 1183          | 0.052          |
| 120          | 1524          | 0.076          | 305          | 1222          | 0.052          |
| 125          | 1544          | 0.073          | 310          | 1215          | 0.052          |
| 130          | 1601          | 0.072          | 315          | 1204          | 0.053          |
| 135          | 1618          | 0.071          | 320          | 1146          | 0.053          |
| 140          | 1587          | 0.071          | 325          | 1135          | 0.052          |
| 145          | 1518          | 0.067          | 330          | 1114          | 0.051          |
| 150          | 1460          | 0.067          | 335          | 1066          | 0.052          |
| 155          | 1430          | 0.066          | 340          | 1045          | 0.051          |
| 160          | 1409          | 0.066          | 345          | 999           | 0.051          |
| 165          | 1339          | 0.067          | 350          | 933           | 0.051          |
| 170          | 1330          | 0.066          | 355          | 908           | 0.05           |
| 175          | 1315          | 0.066          | 360          | 864           | 0.049          |
| 180          | 1256          | 0.063          | 365          | 827           | 0.05           |
| 185          | 1207          | 0.063          | 370          | 805           | 0.049          |
| 190          | 1241          | 0.061          | 375          | 815           | 0.05           |
| 195          | 1249          | 0.06           | 380          | 782           | 0.05           |
| 200          | 1249          | 0.059          | 385          | 703           | 0.05           |
| 205          | 1203          | 0.059          | 390          | 671           | 0.052          |
| 210          | 1159          | 0.059          | 395          | 655           | 0.053          |
| 215          | 1157          | 0.058          | 400          | 667           | 0.053          |
| 220          | 1193          | 0.057          |              |               |                |
